# Supplementary material for: Selective HDAC8 Inhibition Attenuates Isoproterenol-Induced Cardiac Hypertrophy and Fibrosis via p38 MAPK Pathway
Source: PubMed Central journal article supplement (PMC8093872; doi:10.3389/fphar.2021.677757), 2021-04-20
Supplement: datasheet1.pdf [file datasheet1.pdf]

## Supplementary Figure Legends

### Online Figure 1. PCI34051 treatment restores echocardiographic parameters in the isoproterenol-infused cardiac hypertrophy mouse model.

(A and B) Left ventricular internal diameters (LVIDs and LVIDd) at end-systole or end-diastole in isoproterenol-infused mice with or without PCI34051 treatment (30 mg/kg/day for 5 days, n=6). \*\*\* $P < 0.001$ , ## $P < 0.01$ . NS = not significant. (C and D) Ejection fraction (EF, %) and fractional shortening (FS, %) in mice described in (A-B). \*\*\* $P < 0.001$ , ## $P < 0.01$ , and ### $P < 0.001$ . Data are presented as the mean  $\pm$  S.E. Statistics: one-way ANOVA followed by Bonferroni *post hoc* tests.

### Online Figure 2. The HDAC8 selective inhibitor attenuates the expression of cardiac-specific transcription factors in isoproterenol-infused mice.

PCI34051 (30 mg/kg/day) was administered for 5 days after infusing mice with isoproterenol. The mRNA expression levels of *Sp1* (A), *Gata4* (B), and *Gata6* (C) were evaluated by RT-PCR. \*\*\* $P < 0.001$ ; ### $P < 0.001$ . Data are presented as mean  $\pm$  S.E. Statistics: one-way ANOVA followed by Bonferroni *post hoc* tests.

### Online Figure 3. HDAC8 selective inhibitor attenuates the expression of cardiac fibrosis genes in isoproterenol-infused mice.

PCI34051 (30 mg/kg/day) was administered for 5 days after infusing mice with isoproterenol. The mRNA expression levels of *Sma* (A) and *Tgfb1* (B) were determined by RT-PCR (n=8). \*\*\* $P < 0.001$ ; ### $P < 0.001$ . (C) Protein levels of SMA and TGF- $\beta$ 1 were determined by western blotting. Representative images of the blots are shown. (D) Quantification of SMA and TGF- $\beta$ 1 protein levels (n=6). \* $P < 0.05$  and \*\*\* $P < 0.001$ ; # $P < 0.05$  and ## $P < 0.01$ . Data are presented as mean  $\pm$  S.E. Statistics: one-way ANOVA followed by Bonferroni *post hoc* tests.

### Online Figure 4. HDAC8 selective inhibitor reduces the mRNA expression of transcription factors in H9c2 cells stimulated with isoproterenol.

H9c2 cells were treated with vehicle or isoproterenol (10  $\mu$ M, 6 h) in the presence or absence of PCI34051 (10 or 100 nM, 5 h). mRNA expression levels of *Sp1* (A), *Gata4* (B), and *Gata6* (C) were determined using RT-PCR (n=6–9). \*\* $P < 0.01$ ; # $P < 0.05$  and ## $P < 0.01$ . Data are presented as mean  $\pm$  S.E. Statistics: one-way ANOVA followed by Bonferroni *post hoc* tests.

### Online Figure 5. HDAC8 overexpression does not affect *Hdac2* and *Hsp70* mRNA levels

**in H9c2 cells.**

H9c2 cells were transfected with *pCMV6-HA-Myc* or *pCMV6-Hdac8-HA-Myc* for 48 h. The mRNA levels of *Hdac2* (A) and *Hsp70* (B) were determined using RT-PCR (n=10–12). NS indicates not significant (Student's *t* test).

**Online Figure 6. HDAC8 selective inhibitor or HDAC8 knockdown does not affect isoproterenol-induced *Hsp70* mRNA levels *in vivo* and *in vitro*.**

(A) PCI34051 (30 mg/kg/day) was administered for 5 days after infusing mice with isoproterenol. The mRNA expression levels of *Hsp70* were determined by RT-PCR (n=8). \*\*\* $P < 0.001$ . NS = not significant. (B) H9c2 cells were transfected with control or HDAC8 siRNA and stimulated with isoproterenol for 9 h. *Hsp70* mRNA expression levels were determined by RT-PCR (n=6–8). ### $P < 0.001$ . NS = not significant. Data are presented as mean  $\pm$  S.E. Statistics: one-way ANOVA followed by Bonferroni *post hoc* tests.

**Online Figure 7. HDAC8 does not interact with HSP70 in H9c2 cells.**

Immunoprecipitation using the anti-HDAC8 antibody was performed as previously described [1]. Endogenous HDAC8 was enriched with anti-HDAC8 antibody in H9c2 cells. Western blotting was performed with anti-HSP70, anti-p38, and anti-p-p38 antibodies.

## References

- [1] G.R. Kim, S.N. Cho, H.S. Kim, S.Y. Yu, S.Y. Choi, Y. Ryu, M.Q. Lin, L. Jin, H.J. Kee, M.H. Jeong, Histone deacetylase and GATA-binding factor 6 regulate arterial remodeling in angiotensin II-induced hypertension, *J Hypertens* 34(11) (2016) 2206-19.

# Supplementary Figure 1

A

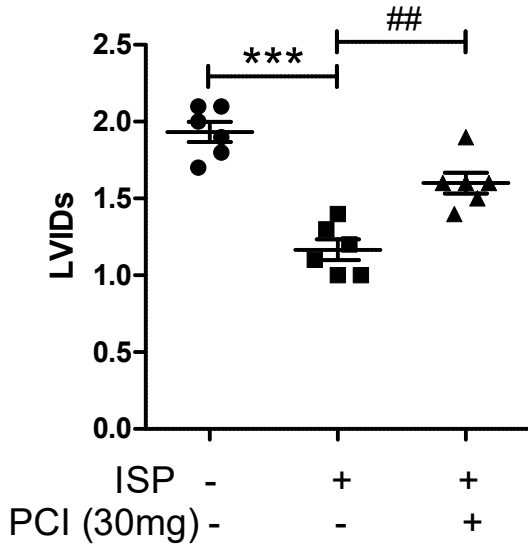

B

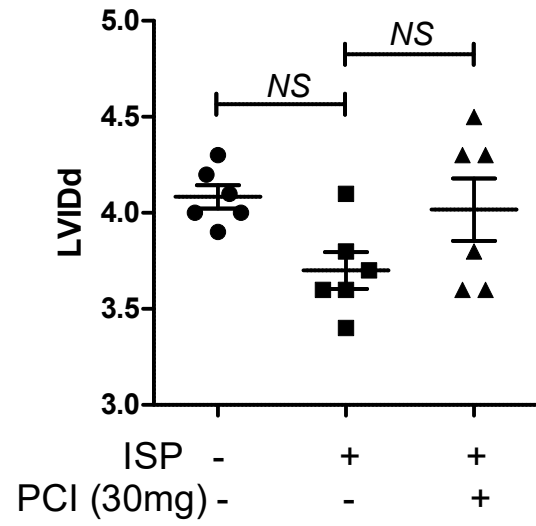

C

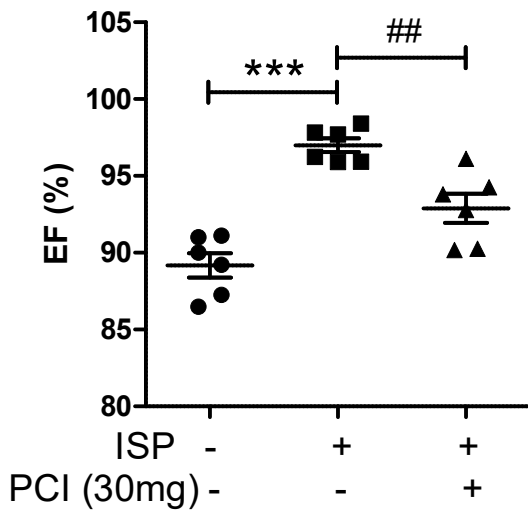

D

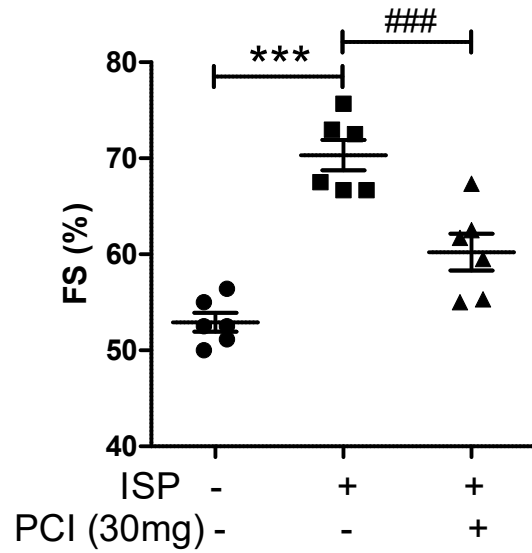

# Supplementary Figure 2

A

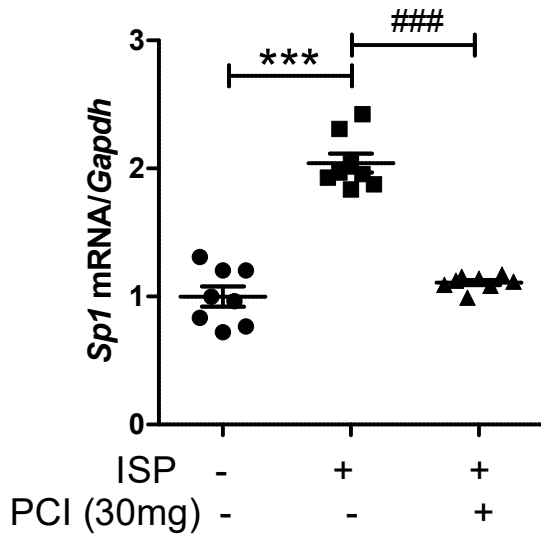

B

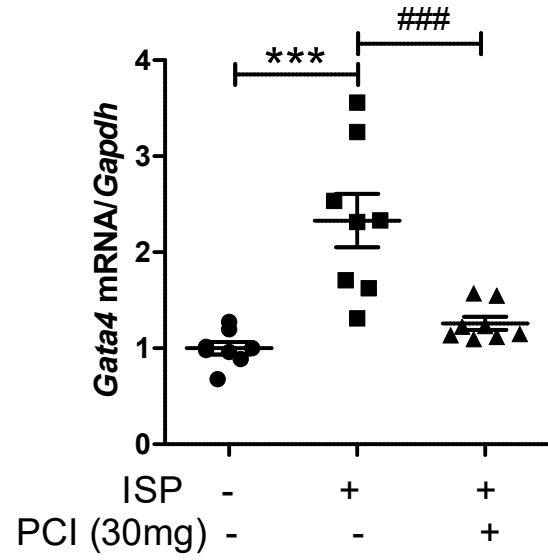

C

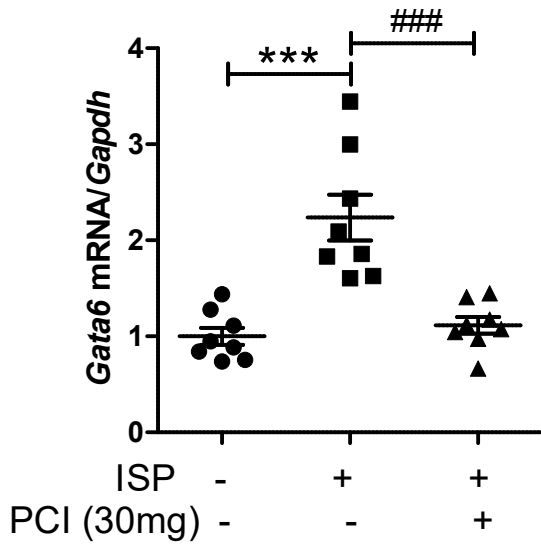

# Supplementary Figure 3

A

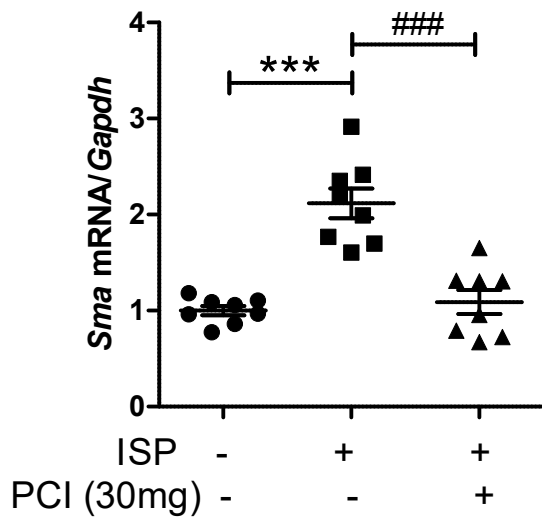

B

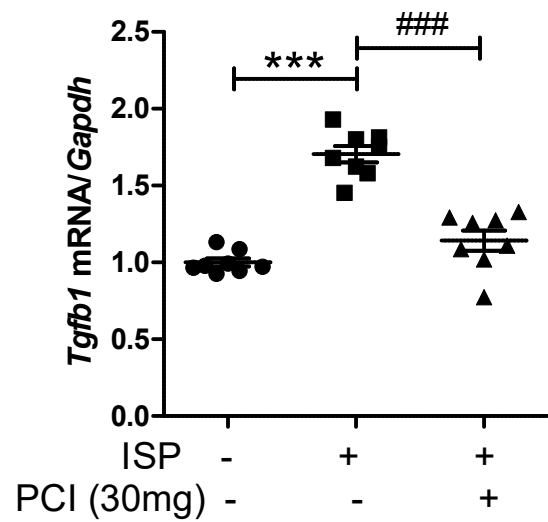

C

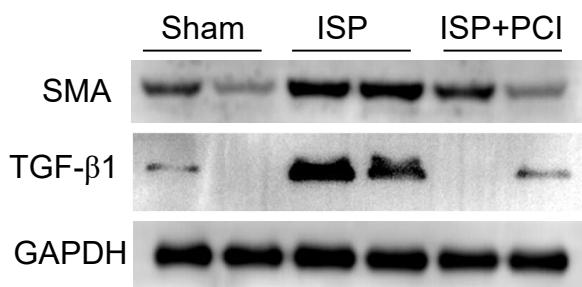

D

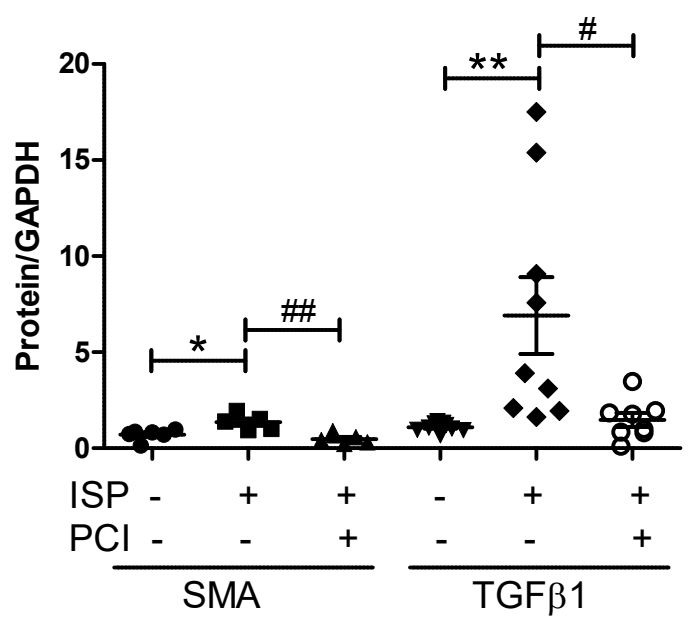

# Supplementary Figure 4

A

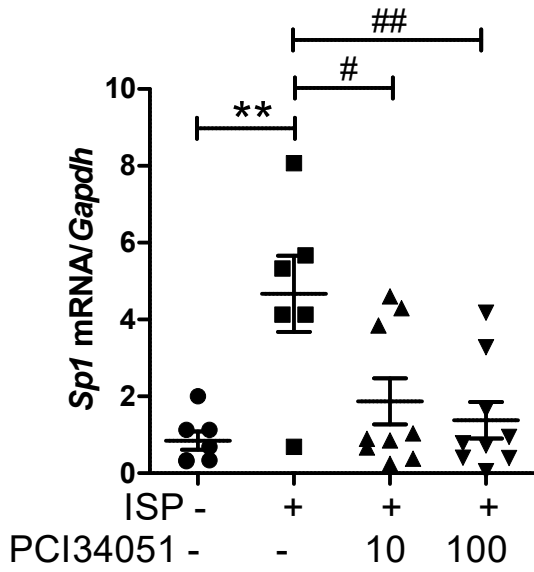

B

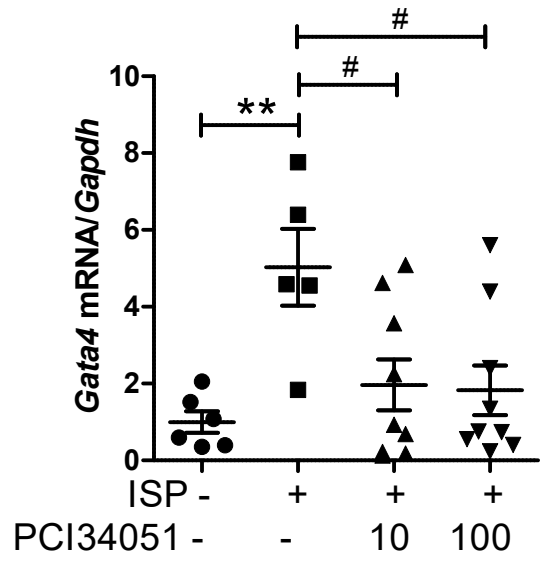

C

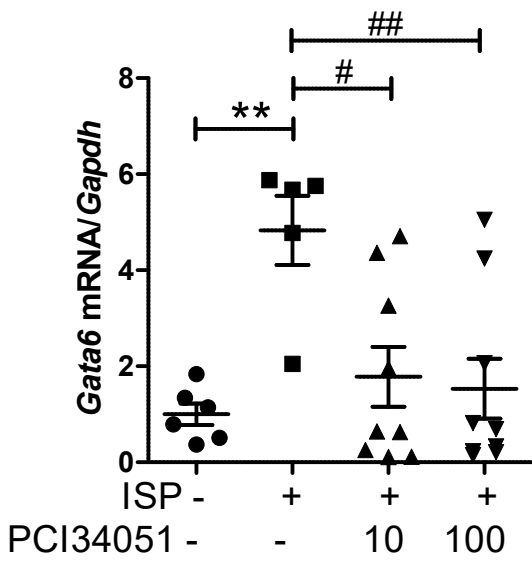

# Supplementary Figure 5

A

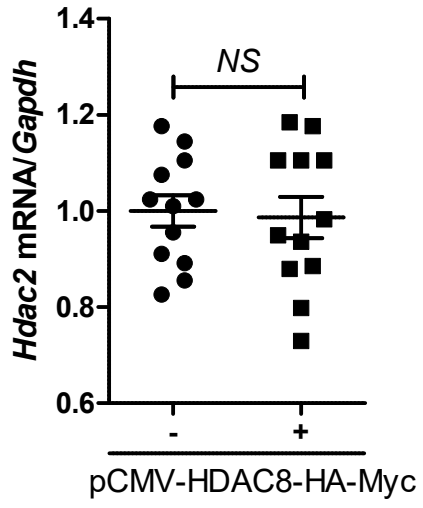

B

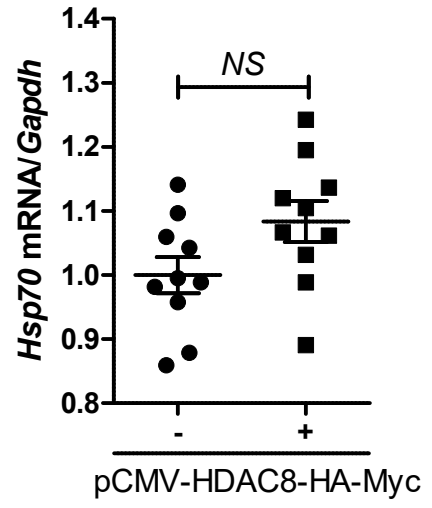



# Supplementary Figure 6

A

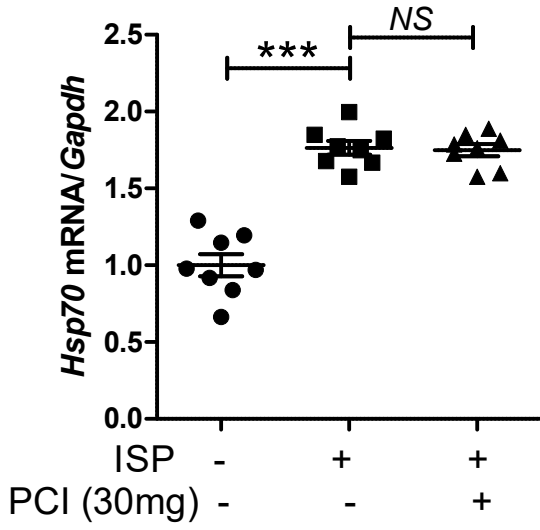

B

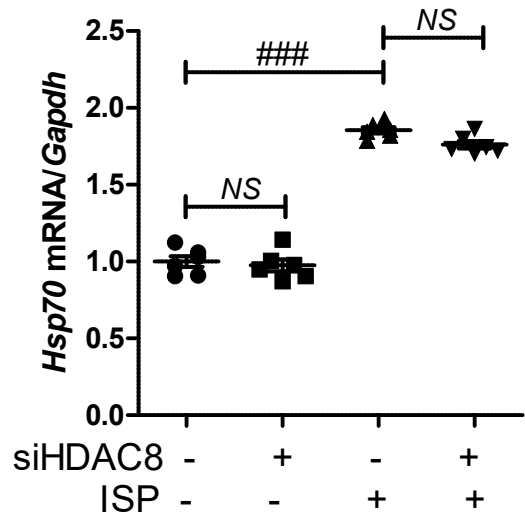

# Supplementary Figure 7

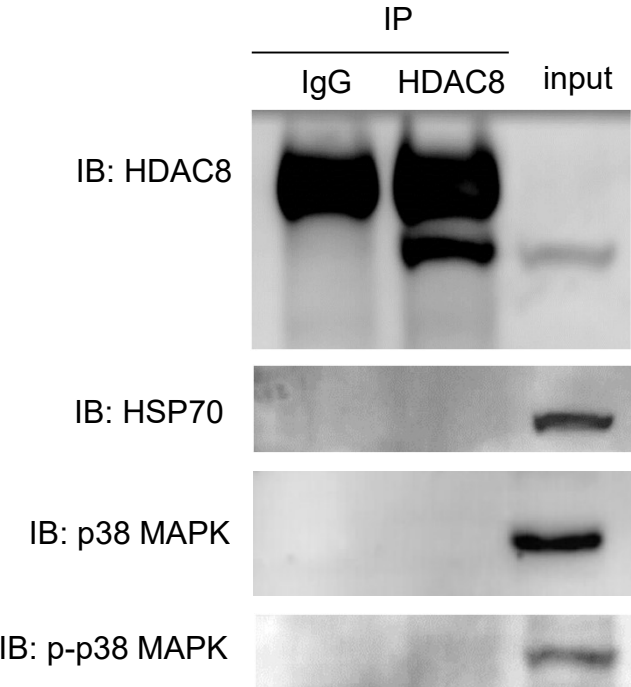

**Table 1. Primers for RT-PCR**

| Gene                       | Primer sequence (5' to 3')                                 |
|----------------------------|------------------------------------------------------------|
| <i>Gapdh (rat)</i>         | F: AACCCATCACCATCTTCCAGGAGC<br>R: ATGGACTGTGGTCATGAGCCCTTC |
| <i>Nppa (rat)</i>          | F: GCTCGAGCAGATCGCAAAG<br>R: GAGTGGGAGAGGTAAGGCCT          |
| <i>Nppb (rat)</i>          | F: GACGGGCTGAGGTTGTTTTA<br>R: ACTGTGGCAAGTTTGTGCTG         |
| <i>Myh7 (rat)</i>          | F: CCTCGCAATATCAAGGGAAA<br>R: TACAGGTGCATCAGCTCCAG         |
| <i>Sp1 (rat=mouse)</i>     | F: TCTGCAGCTACCCTGACTCC<br>R: TAATTCCCATGTTGCTGGTG         |
| <i>Gata4 (rat)</i>         | F: AGTCCTGCACAGCCTACCTG<br>R: GCCGGTTGATAACCATTCATC        |
| <i>Gata6 (rat)</i>         | F: CTACACTTCCCATCCCTTCG<br>R: CGAGCGTCTGGTACATTTCC         |
| <i>Hsp70 (rat)</i>         | F: ACCAACCACCTCAAGCAAAG<br>R: GTCATTCCGTTCTTCTCCA          |
| <i>Hdac2 (rat)</i>         | F: CTGCACCACGCCAAGAAGTCAGA<br>R: CAGTTAGGTTGAAGCAGCCCAGCC  |
| <i>Collagen I (mouse)</i>  | F: GAGCGGAGAGTACTGGATCG<br>R: GCTTCTTTTCCTTGGGGTTC         |
| <i>Fibronectin (mouse)</i> | F: GATGCACCGATTGTCAACAG<br>R: TGATCAGCATGGACCACTTC         |
| <i>Ctgf (mouse)</i>        | F: CAAAGCAGCTGCAAATACCA<br>R: GGCCAAATGTGTCTTCCAGT         |

|                      |                                                              |
|----------------------|--------------------------------------------------------------|
| <i>Hdac8 (mouse)</i> | F: TCCGAAGGCAGTGGTTTTAC<br>R: GATGACCCCGGTCAAGTATG           |
| <i>Gapdh (mouse)</i> | F: GCATGGCCTTCCGTGTTTCCT<br>R: CCCTGTTGCTGTAGCCGTATTCAT      |
| <i>Nppa (mouse)</i>  | F: TGGAGGAGAAGATGCCGGTAGAAGAT<br>R: AGCGAGCAGAGCCCTCAGTTTGCT |
| <i>Nppb (mouse)</i>  | F: CTGAAGGTGCTGTCCCAGAT<br>R: GTTCTTTTGTGAGGCCTTGG           |
| <i>Myh7 (mouse)</i>  | F: GCATTCTCCTGCTGTTTCCT<br>R: CCCAAATGCAGCCATCTC             |
| <i>Gata4 (mouse)</i> | F: CTGTGCCAACTGCCAGACTA<br>R: ATTCAGGTTCTTGGGCTTCC           |
| <i>Gata6 (mouse)</i> | F: GCCAACTGTCACACCACAAC<br>R: GTTACCGGAGCAAGCTTTTG           |
| <i>Sma (mouse)</i>   | F: ACTGGGACGACATGGAAAAG<br>R: AGAGGCATAGAGGGACAGCA           |
| <i>Tgfb1 (mouse)</i> | F: CTCTCCACCTGCAAGACCAT<br>R: ACGCGGGTGACCTCTTTAG            |
